# Supplementary material for: Deep learning segmentation of major vessels in X-ray coronary angiography
Source: PubMed Central journal article supplement (PMC6858336; doi:10.1038/s41598-019-53254-7), 2019-11-15
Supplement: 41598_2019_53254_MOESM1_ESM.pdf [file 41598_2019_53254_MOESM1_ESM.pdf]

Table 1. Model architectures. Blue and green denote the encoder and decoder parts of deep learning architectures, respectively. (Repository: <https://github.com/suyang93/Major-vessel-segmentation-on-X-ray-Angiography>)

| SimpleUNet                            | ResNet101                                                                                                           | DenseNet121                                      | InceptionResNet-v2                            |
|---------------------------------------|---------------------------------------------------------------------------------------------------------------------|--------------------------------------------------|-----------------------------------------------|
| Input shape = (512, 512, 3)           |                                                                                                                     |                                                  |                                               |
| Conv3, 32<br>Conv3, 32<br>(U-Conv1)   | Conv7-A, 64, stride 2<br>(R-Conv1)                                                                                  | Conv7-A, 64, stride 2<br>(D-Conv1)               | Stem block, 64<br>(I-Conv1)                   |
| MaxPool2, stride 2                    | MaxPool3, stride 2                                                                                                  | MaxPool3, stride 2                               | Stem block, 192<br>(I-Conv2)                  |
| Conv3, 64<br>Conv3, 64<br>(U-Conv2)   | $3 \times \begin{bmatrix} 1 \times 1, & 64 \\ 3 \times 3, & 64 \\ 1 \times 1, & 256 \end{bmatrix}$<br>(R-Conv2)     | 6 × Dense block<br>Bottleneck, 128<br>(D-Conv2)  | Inception block-A, 320                        |
| MaxPool2, stride 2                    |                                                                                                                     | AvgPool2,<br>stride 2                            | 10 × InceptionResNet-<br>A, 320<br>(I-Conv3)  |
| Conv3, 128<br>Conv3, 128<br>(U-Conv3) | $4 \times \begin{bmatrix} 1 \times 1, & 128 \\ 3 \times 3, & 128 \\ 1 \times 1, & 512 \end{bmatrix}$<br>(R-Conv3)   | 12 × Dense block<br>Bottleneck, 256<br>(D-Conv3) | Reduction-A, 1088                             |
| MaxPool2, stride 2                    |                                                                                                                     | AvgPool2,<br>stride 2                            | 20 × InceptionResNet-<br>B, 1088<br>(I-Conv4) |
| Conv3, 256<br>Conv3, 256<br>(U-Conv4) | $23 \times \begin{bmatrix} 1 \times 1, & 256 \\ 3 \times 3, & 256 \\ 1 \times 1, & 1024 \end{bmatrix}$<br>(R-Conv4) | 24 × Dense block<br>Bottleneck, 512<br>(D-Conv4) | Reduction-B, 2080                             |
| MaxPool2, stride 2                    |                                                                                                                     | AvgPool2,<br>stride 2                            | 10 × InceptionResNet-<br>C, 2080              |
| Conv3, 512<br>Conv3, 512              | $3 \times \begin{bmatrix} 1 \times 1, & 512 \\ 3 \times 3, & 512 \\ 1 \times 1, & 2048 \end{bmatrix}$               | 16 × Dense block<br>Bottleneck, 1024             | Conv1, 1536                                   |
| Upsamp2, stride 2 (Up4)               |                                                                                                                     |                                                  |                                               |
| Concat<br>[U-Conv4, Up4]              | Concat<br>[R-Conv4, Up4]                                                                                            | Concat<br>[D-Conv4, Up4]                         | Concat<br>[I-Conv4, Up4]                      |
| Conv3, 256<br>Conv3, 256              |                                                                                                                     |                                                  |                                               |
| Upsamp2, stride 2 (Up3)               |                                                                                                                     |                                                  |                                               |
| Concat<br>[U-Conv3, Up3]              | Concat<br>[R-Conv3, Up3]                                                                                            | Concat<br>[D-Conv3, Up3]                         | Concat<br>[I-Conv3, Up3]                      |
| Conv3, 128<br>Conv3, 128              |                                                                                                                     |                                                  |                                               |
| Upsamp2, stride 2 (Up2)               |                                                                                                                     |                                                  |                                               |
| Concat<br>[U-Conv2, Up2]              | Concat<br>[R-Conv2, Up2]                                                                                            | Concat<br>[D-Conv2, Up2]                         | Concat<br>[I-Conv2, Up2]                      |
| Conv3, 64<br>Conv3, 64                |                                                                                                                     |                                                  |                                               |
| Upsamp2, stride 2 (Up1)               |                                                                                                                     |                                                  |                                               |
| Concat<br>[U-Conv1, Up1]              | Concat<br>[R-Conv1, Up1]                                                                                            | Concat<br>[D-Conv1, Up1]                         | Concat<br>[I-Conv1, Up1]                      |
| Conv3, 32<br>Conv3, 2                 | Conv3, 32<br>Conv3, 32                                                                                              |                                                  |                                               |
|                                       | Upsamp2, stride 2                                                                                                   |                                                  |                                               |
|                                       | Conv3, 16<br>Conv3, 16                                                                                              |                                                  |                                               |
|                                       | Conv3, 2                                                                                                            |                                                  |                                               |

Conv3, 3 × 3 convolution layer; Conv7, 7 × 7 convolution layer; Conv1, 1 × 1 convolution layer; MaxPool2, 2 × 2 max pooling layer; MaxPool3, 3 × 3 max pooling layer; AvgPool2, 2 × 2 average pooling layer; Upsamp2, 2 × 2 up-sampling layer; Concat, concatenation layer.

Table 2 Comparison of major vessel segmentation between deep learning networks for fold 5. The evaluation was performed with the same experiment setting as the ‘Hyperparameter’ test in Table 2.

|                          | Recall                              | Precision                           | F1 score                            |
|--------------------------|-------------------------------------|-------------------------------------|-------------------------------------|
| SimpleUNet               | $0.872 \pm 0.148$                   | $0.886 \pm 0.118$                   | $0.873 \pm 0.126$                   |
| ResNet101                | $0.919 \pm 0.106$                   | $0.916 \pm 0.091$                   | $0.915 \pm 0.092$                   |
| DenseNet121              | <b><math>0.933 \pm 0.085</math></b> | $0.916 \pm 0.084$                   | $0.923 \pm 0.078$                   |
| InceptionResNet-v2       | $0.928 \pm 0.095$                   | <b><math>0.924 \pm 0.092</math></b> | <b><math>0.925 \pm 0.088</math></b> |
| PSPNet <sup>1</sup>      | $0.914 \pm 0.098$                   | $0.906 \pm 0.093$                   | $0.908 \pm 0.088$                   |
| DeepLab v3+ <sup>2</sup> | $0.914 \pm 0.109$                   | $0.913 \pm 0.098$                   | $0.911 \pm 0.097$                   |

1. PSPNet: Pyramid Scene Parsing Network
  - a. <https://github.com/Vladkryvoruchko/PSPNet-Keras-tensorflow/blob/master/pspnet.py>
2. DeepLab v3+: Encoder-Decoder with Atrous Separable Convolution for Semantic Image Segmentation
  - a. <https://github.com/Golbstein/Keras-segmentation-deeplab-v3.1/blob/master/deeplabv3p.py>
